# Supplementary material
Source: PubMed Central journal article supplement (PMC3768014)
Supplement: NIHMS504059-supplement-1.pdf [file NIHMS504059-supplement-1.pdf]

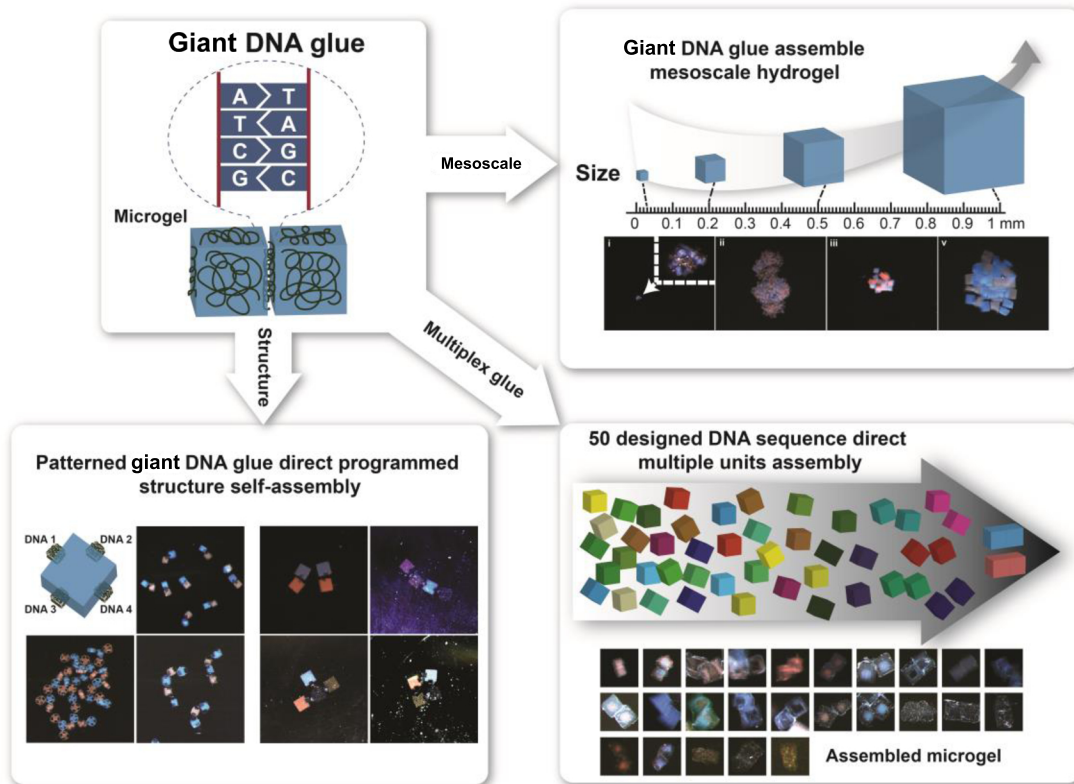

**Supplementary figure S1** | DNA directed self-assembly of hydrogel units.

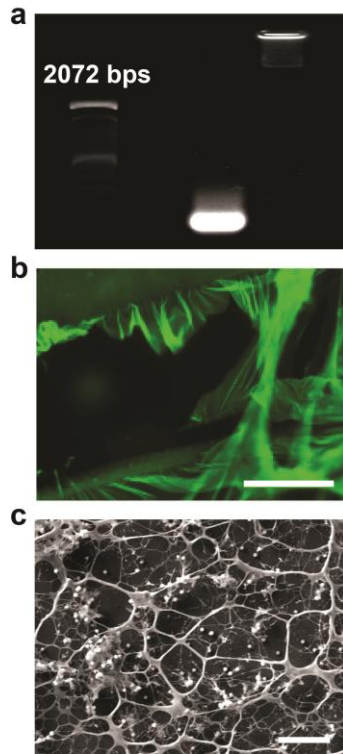

**Supplementary figure S2** | **a**, Single-stranded 84-nt DNA primer before amplification (middle lane) and post-amplification giant DNA (right lane) on 1% agarose gel, stained with SYBR Gold. Left lane, 100 bp DNA ladder with the 2072 bp fragment labeled. **b**, Giant DNA amplified from an 84-nt primer tethered on PEG surface. The giant DNA was stained by SYBR gold. Scale bar, 1 mm. **c**, SEM image of amplified giant DNA on glass surface. Scale bar, 50  $\mu$ m.

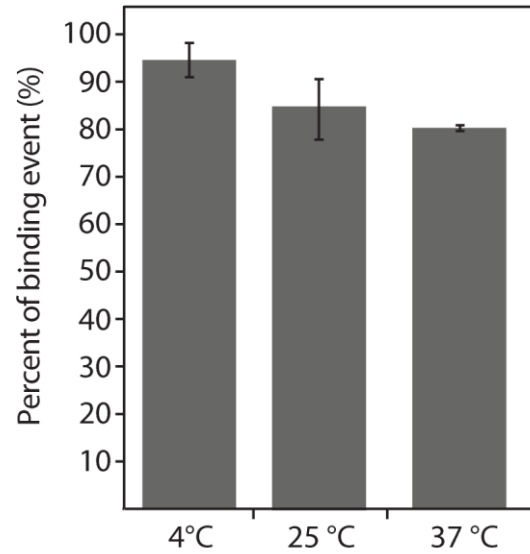

**Supplementary figure S3** | Quantification of giant DNA glue directed assembly between gel cubes under different temperatures. Assembly quantification under different temperatures were performed by assembling only two hydrogel cubes uniformly carrying complementary giant DNA glue in one microtube at 4°C, 25°C and 37°C respectively. Six independent experiments, each including 10 microtube samples, were performed at each temperature respectively and analyzed using STDEV function for standard deviation by software Excel (Microsoft<sup>TM</sup>).

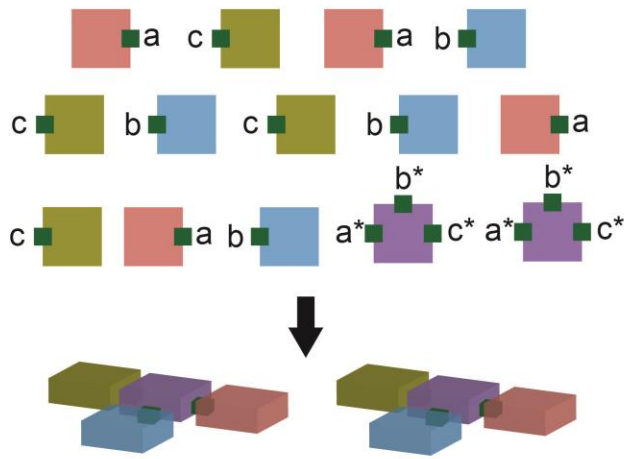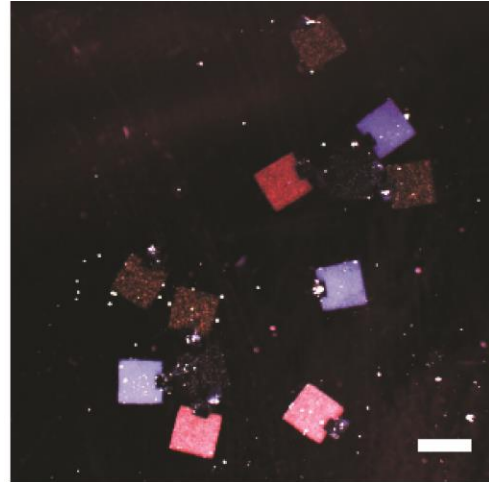

**Supplementary figure S4** | Two copies of T-junctions structures were self-assembled from four specific red, blue, yellow, and violet  $1 \text{ mm} \times 1 \text{ mm} \times 0.3 \text{ mm}$  PEG cuboids carrying patterned giant DNA glues. In the schematic, the parts that contain DNA are colored green and labeled with letters, where  $x$  and  $x^*$  denote two complementary DNA glues. See Supplementary Table S1 for DNA sequences. Scale bar, 1 mm.

**Supplementary Table S1: DNA sequence**

| Name      | Sequence (5'-3')                                                 |
|-----------|------------------------------------------------------------------|
| a         | CTCTACTACCTTCTCCCTCCCACAAACGCAAACCCACTACCACCAAAC                 |
| a*        | GTTTGGTGGTAGTGGGTTTGC GTTTGTGGGAGGGAGAAGGTAGTAGAG                |
| b         | TCAATGTAAGTGCAGATAAAGTACTCGCGCACTACTATGTTTTAGCTA                 |
| b*        | TAGCTAAAACATAGTAGTGC GCGAGTACTTTATCTGCACTTACATTGA                |
| c         | GACTATATCGTATCGACTCATCCATGATAGTAATCAATTCAGGCCATC                 |
| c*        | GATGGCCTGAATTGATTACTATCATGGATGAGTCGATACGATATAGTC                 |
| Primer a  | TTTTTTTTTTTTTTTTTTTTTTTTTTTTTTTTTTTTTTTTTTGGAGGGAGAAGGTAGTAGAG   |
| Primer a* | TTTTTTTTTTTTTTTTTTTTTTTTTTTTTTTTTTTTTTTTTCTCTACTACCTTCTCCCTCC    |
| Primer b  | TTTTTTTTTTTTTTTTTTTTTTTTTTTTTTTTTTTTTTTTTTTGC GCGAGTACTTTATCTGC  |
| Primer b* | TTTTTTTTTTTTTTTTTTTTTTTTTTTTTTTTTTTTTTTTTTTGC GCACTACTATGTTTTAGC |
| Primer c  | TTTTTTTTTTTTTTTTTTTTTTTTTTTTTTTTTTTTTTTTTTTACTATCATGGATGAGTCG    |
| Primer c* | TTTTTTTTTTTTTTTTTTTTTTTTTTTTTTTTTTTTTTTTTTTATCGACTCATCCATGATAG   |
| PolyT     | TTTTTTTTTTTTTTTTTTTTTTTTTTTTTTTTTTTTTTTTTT                       |
| D001      | aaaaaactaacatttaactaata                                          |
| D001S     | tattagtaaagttagttttt                                             |
| D002      | aaaaacttattatcaaatfactat                                         |
| D002S     | atagtaattgataataagtttt                                           |
| D003      | attacataattcaattttcata                                           |
| D003S     | tatgaaaaattgaattatgtaaat                                         |
| D004      | aaattacattactaaactfata                                           |
| D004S     | tataaagtttaagtaatgtaatt                                          |
| D005      | attattctaaattctaaaacaata                                         |
| D005S     | tattgttttagaatttagaataat                                         |
| D006      | aaatatactatatactaaactaaa                                         |
| D006S     | tttagtttagtatatagtatatt                                          |
| D007      | ttatcattatacaattactftaa                                          |

|       |                           |
|-------|---------------------------|
| D007S | ttaaagtaaattgataatgataa   |
| D008  | taaattcttttcattatcataaa   |
| D008S | tttatgataatgaaaaagaattta  |
| D009  | aaaaacaataactataactataaat |
| D009S | atftatagtatagtatttgtttt   |
| D010  | aatacttatcaatacatataaat   |
| D010S | atftatatgtatttgataagtatt  |
| D011  | ttattcaaaaactattcttaa     |
| D011S | ttaagaatagtattttgaataa    |
| D012  | taaattcatatatcttacaataaa  |
| D012S | tttattgtaagatatgaattta    |
| D013  | aaaattactttatacaaacattta  |
| D013S | taaagtgttgataaagtaattt    |
| D014  | ttatcttaatattcatttcaaaa   |
| D014S | tttagaatgaatattaagataa    |
| D015  | aatataatcataacatttctata   |
| D015S | tataagaaatggtatgattatatt  |
| D016  | taactaaaaacataacttaattt   |
| D016S | aaattaagtatatgttttagtta   |
| D017  | tttaatcaaaatctaaacatta    |
| D017S | taatgtttagatatttgattaaa   |
| D018  | ttctattacaaaaatcaataaaa   |
| D018S | tttattgatttttgaatagaa     |
| D019  | aaatttcataacttaacatattt   |
| D019S | aaatatgttaaagttatgaattt   |
| D020  | aatctaataacaaatttctatata  |
| D020S | tatatagaatttgttattagatt   |
| D021  | atftcaattcattaataacttaa   |

|       |                           |
|-------|---------------------------|
| D021S | ttaagttattaatgaattgaaat   |
| D022  | atatacattataactaattcaaaat |
| D022S | atgttggaattagataatgtatat  |
| D023  | aataactaatatcttaaaactatat |
| D023S | atataagttttaagatattagtatt |
| D024  | ataaatcatatctattctaattaa  |
| D024S | ttaattagaatagatatgatttat  |
| D025  | atataactaattctataatacaata |
| D025S | tattgtattatagaattagtatat  |
